# Supplementary material
Source: bioRxiv or medRxiv preprint supplement (https://medrxiv.org/highwire/filestream/76244/field_highwire_adjunct_files/0/2020.04.09.20059055-1.pdf)
Supplement: Supplementary file [file 2020.04.09.20059055-1.pdf]

# Forecasting Covid-19 Outbreak Progression in Italian Regions: A model based on neural network training from Chinese data

Cosimo Distante<sup>1</sup>, Igor Gadelha Pereira<sup>2</sup>, Luiz M. Garcia Gonçalves<sup>2</sup>, Prisco Piscitelli<sup>3,4</sup>, Alessandro Miani<sup>4,5</sup>

<sup>1</sup> National Research Council, Institute of Applied Sciences and Intelligence Systems (CNR ISASI), Lecce, Italy

<sup>2</sup> Universidade Federal do Rio Grande do Norte, Campus Universitario, Natal, RN, Brasil

<sup>3</sup> Euro Mediterranean Scientific Biomedical Institute (ISBEM), Bruxelles, Belgium

<sup>4</sup> Italian Society of Environmental Medicine (SIMA), Milan, Italy

<sup>5</sup> Department of Environmental Science and Policy, University of Milan, Milan, Italy

## SUPPLEMENTARY

This section shows all other regions graphs not inserted in the main manuscript. For each region, the forecast of new daily cases and active cases are shown. In last page is reported lethality probability

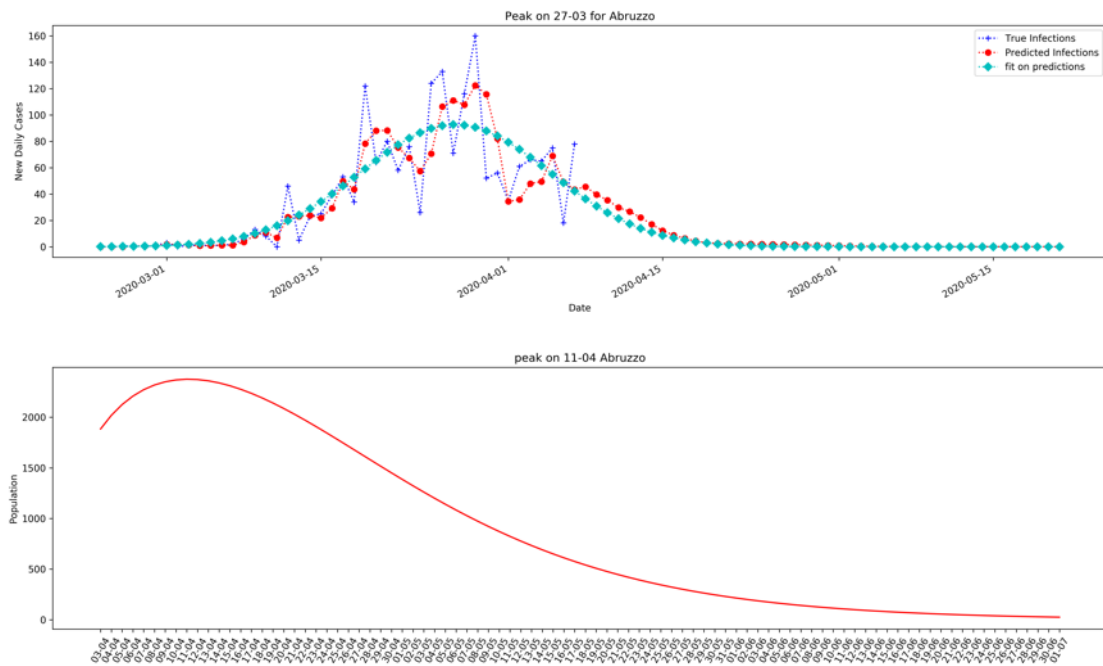

Figure S1 Abruzzo peak predictions (above new daily cases and bottom the active cases)

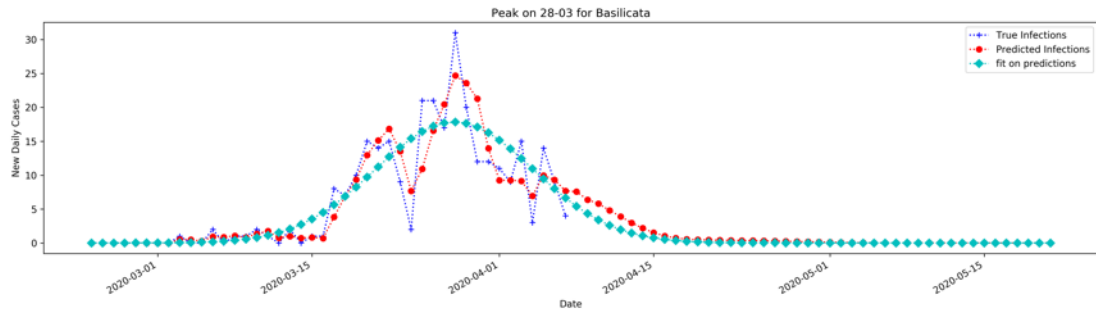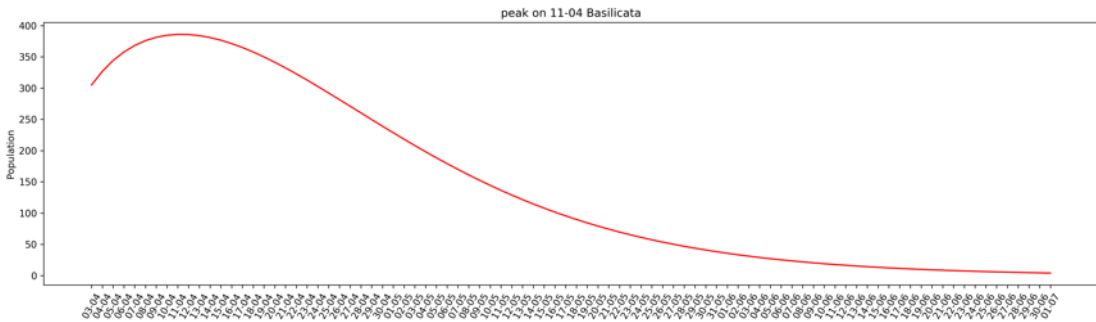

Figure S2 Basilicata peak predictions (above new daily cases and bottom the active cases)

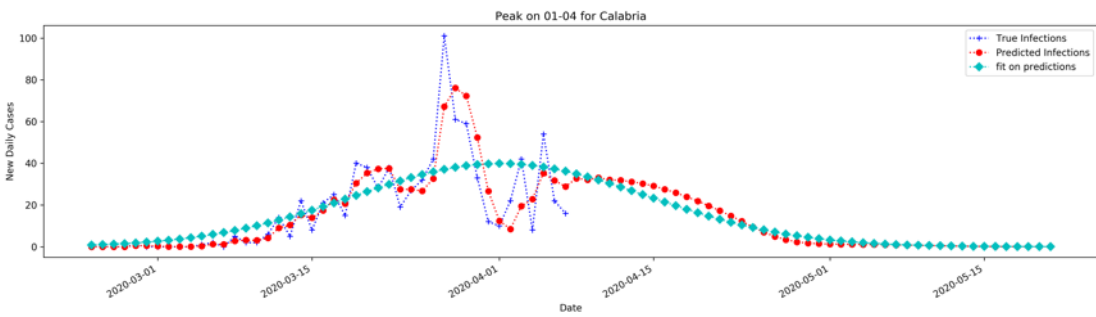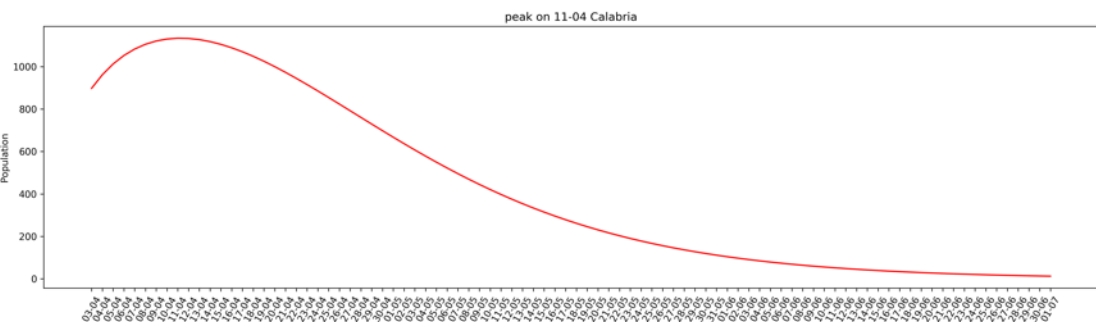

Figure S3 Calabria peak predictions (above new daily cases and bottom the active cases)

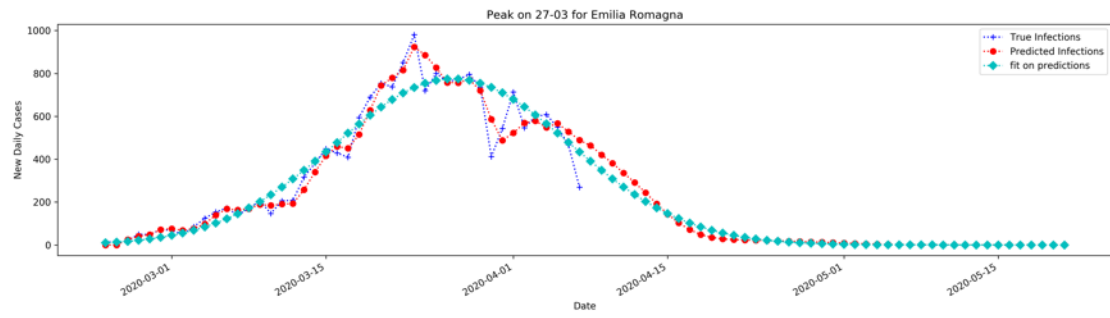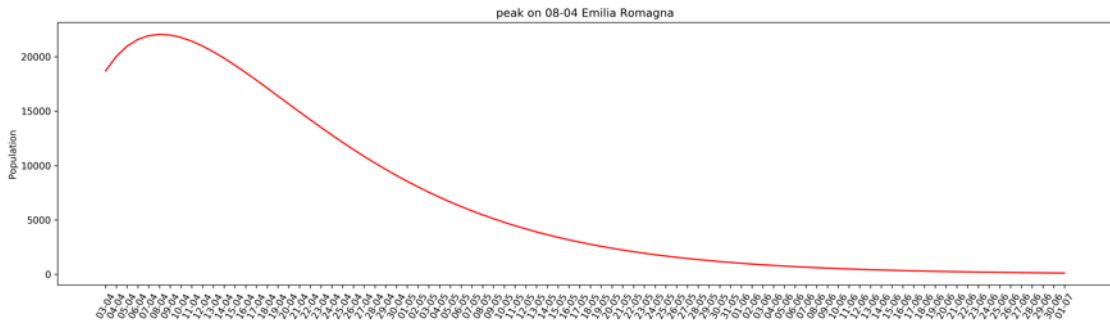

Figure S4 Emilia Romagna peak predictions (above new daily cases and bottom the active cases)

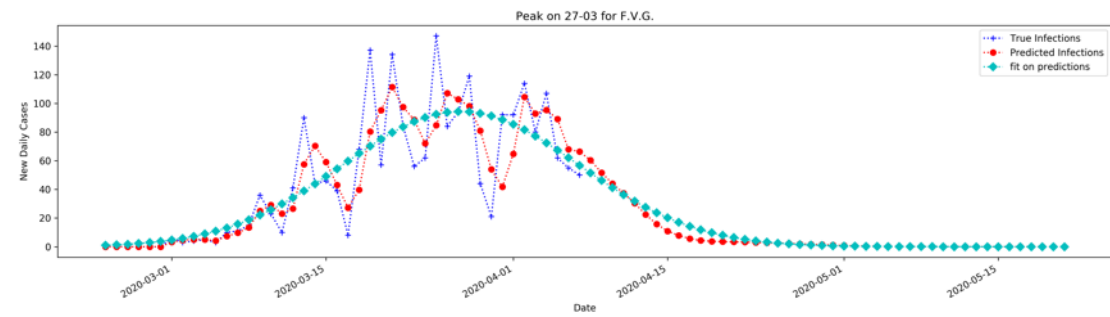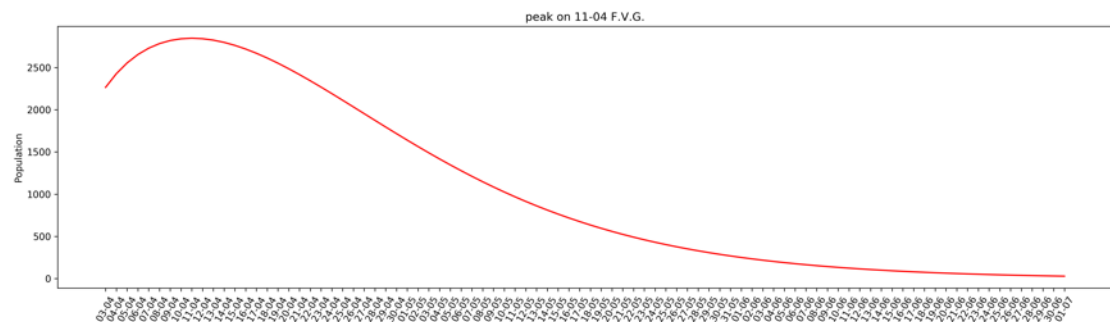

Figure S5 Friuli Venezia Giulia (F.V.G.) peak predictions (above new daily cases and bottom the active cases)

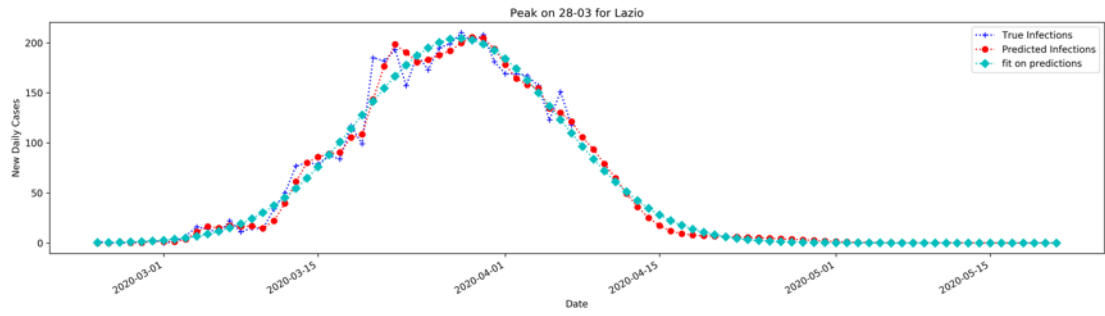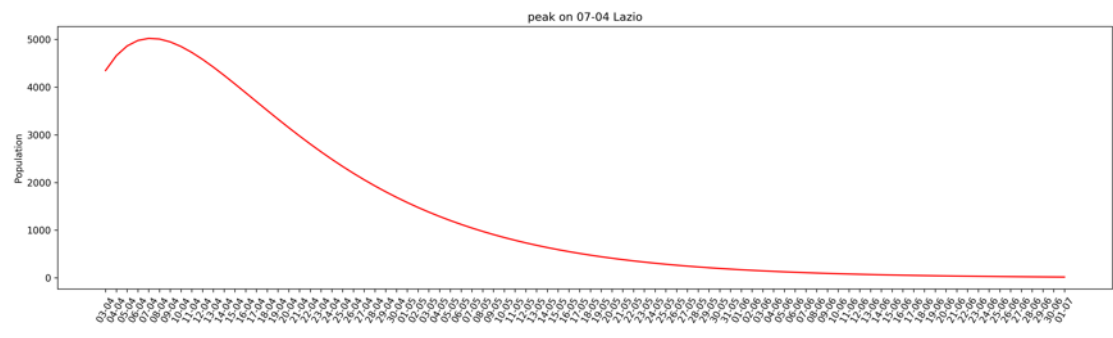

Figure S6 Lazio peak predictions (above new daily cases and bottom the active cases)

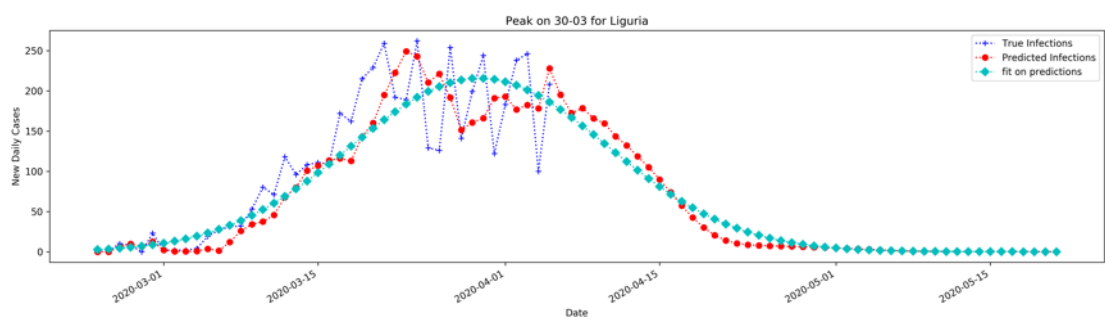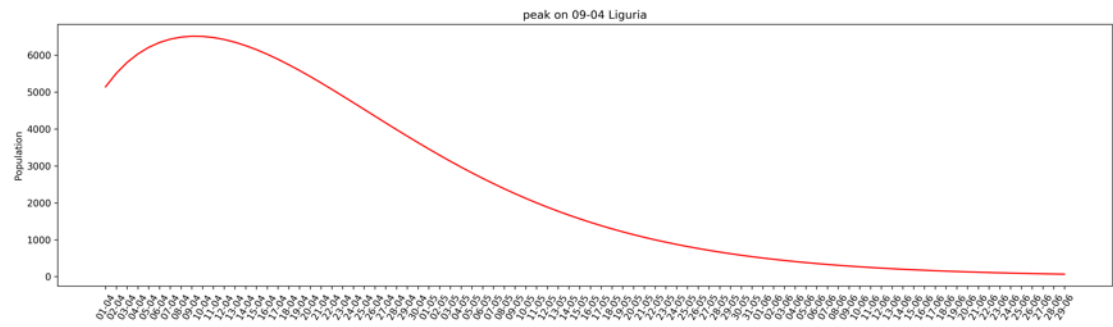

Figure S7 Liguria peak predictions (above new daily cases and bottom the active cases)

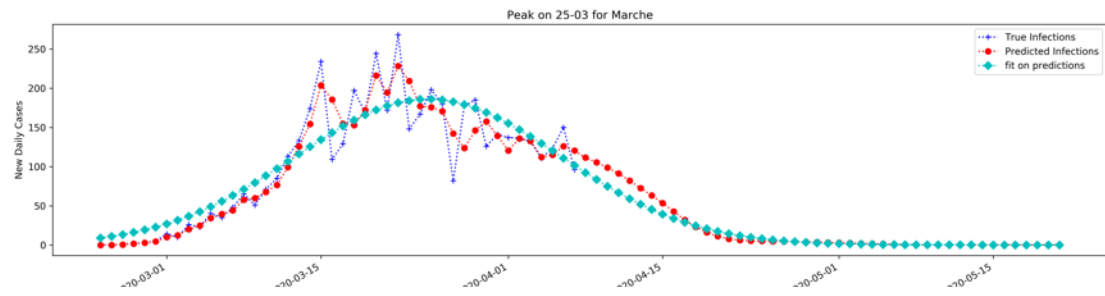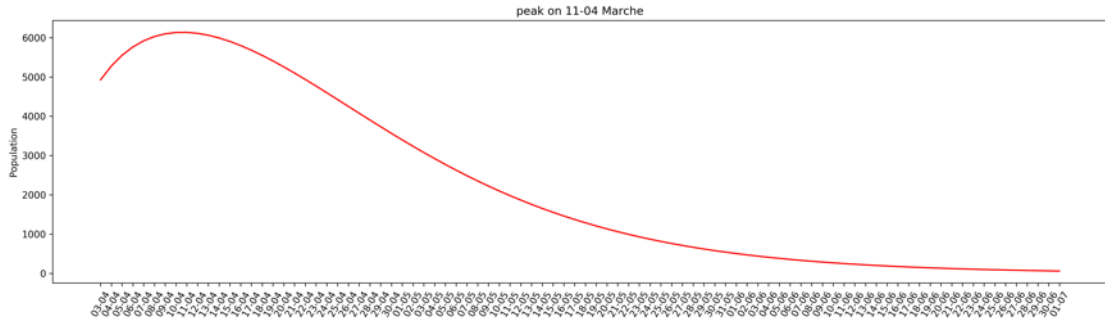

Figure S8 Marche peak predictions (above new daily cases and bottom the active cases)

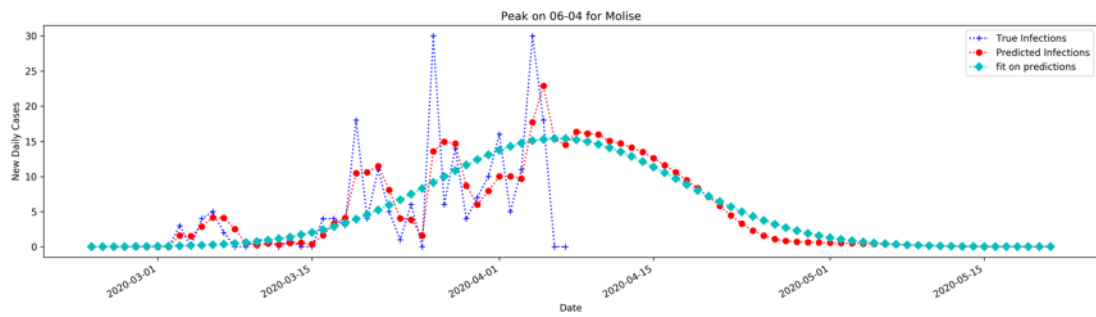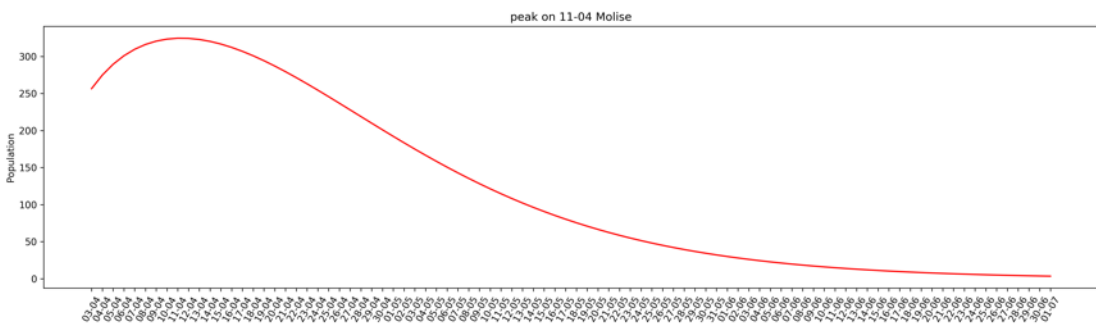

Figure S9 Molise peak predictions (above new daily cases and bottom the active cases)

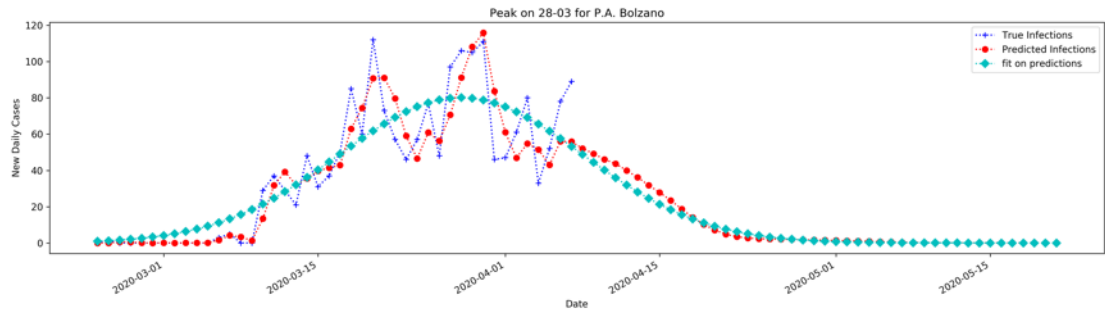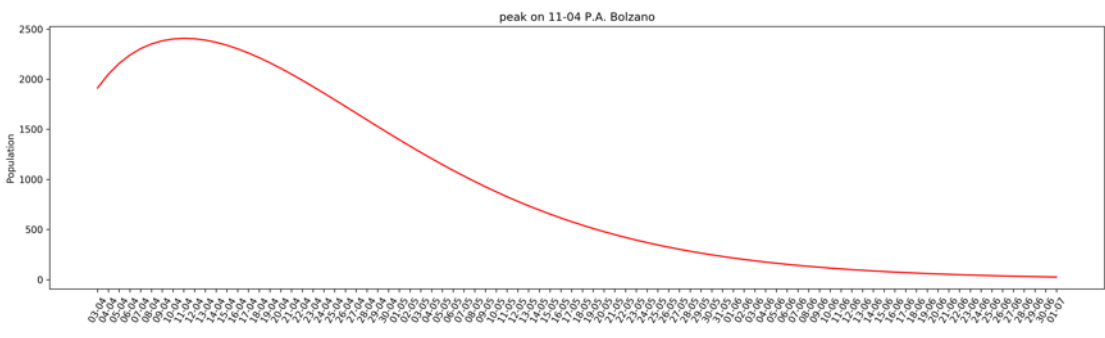

Figure S10 P.A. Bolzano peak predictions (above new daily cases and bottom the active cases)

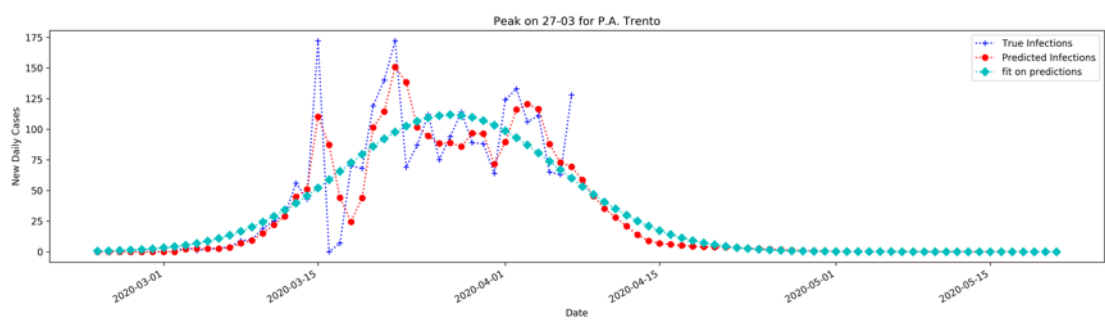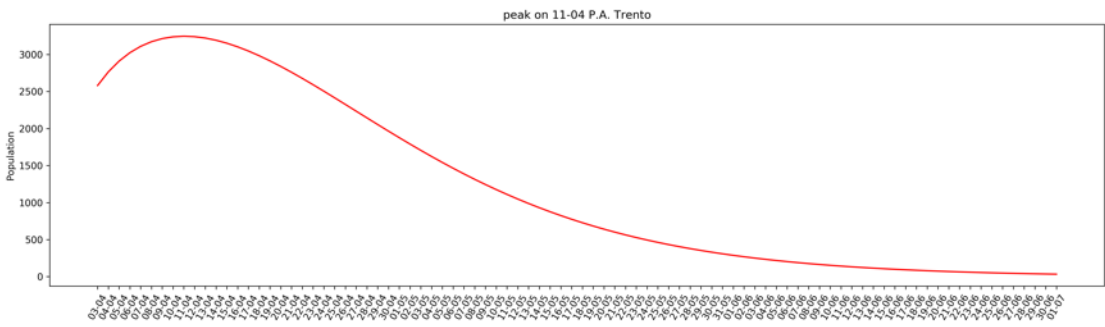

Figure S11 P.A. Trento peak predictions (above new daily cases and bottom the active cases)

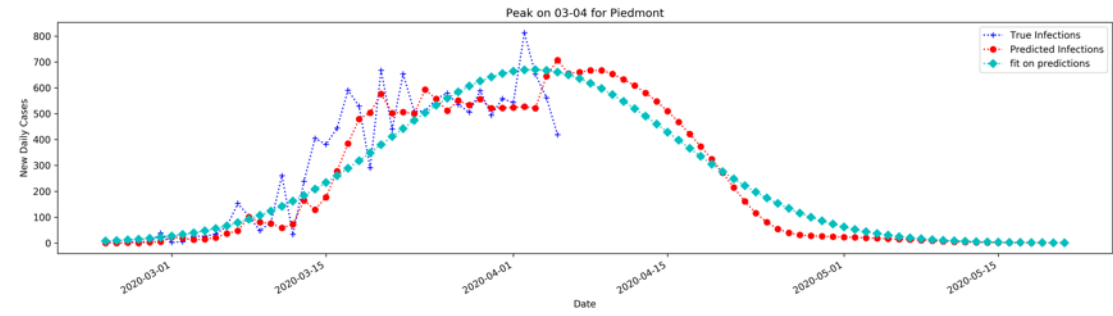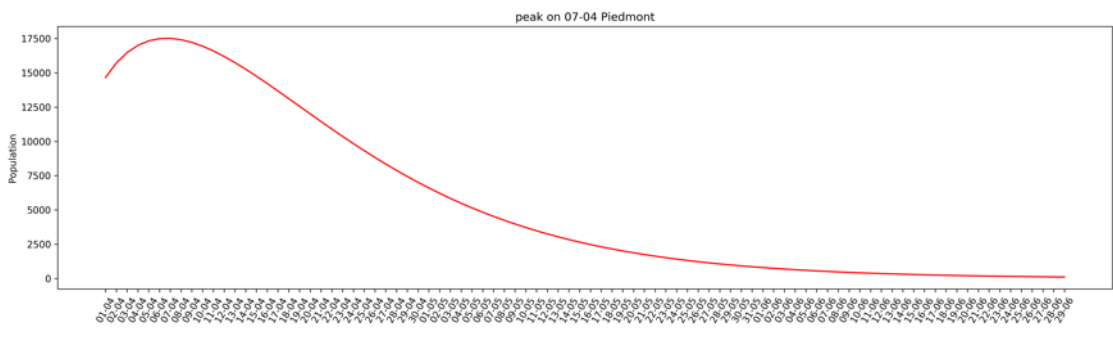

Figure S12 Piedmont peak predictions (above new daily cases and bottom the active cases)

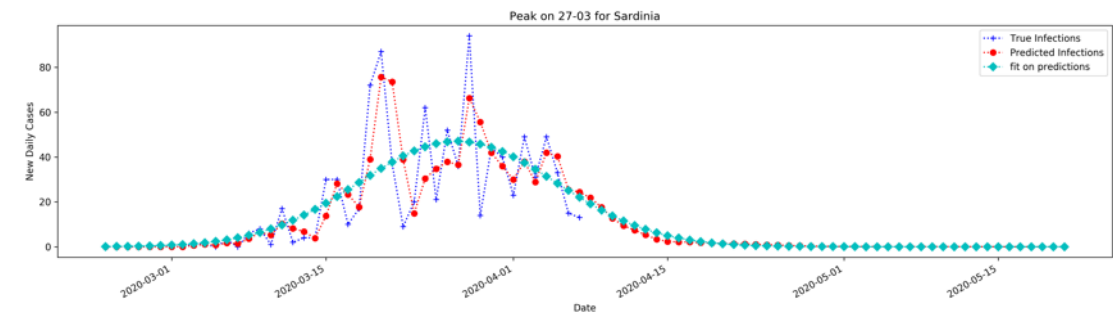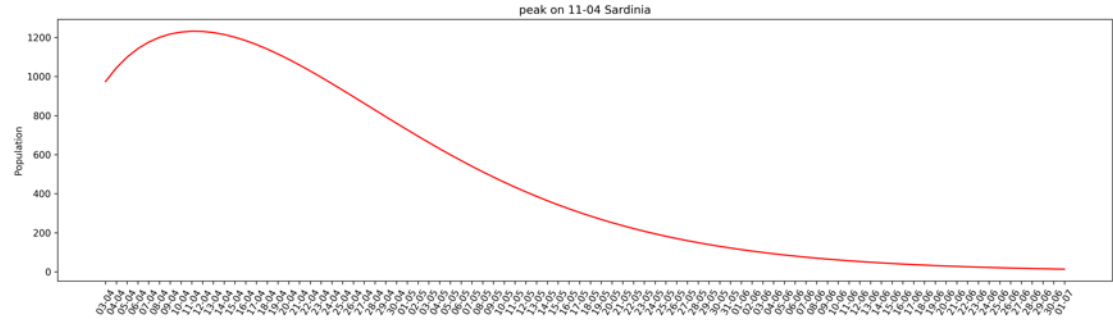

Figure S13 Sardinia peak predictions (above new daily cases and bottom the active cases)

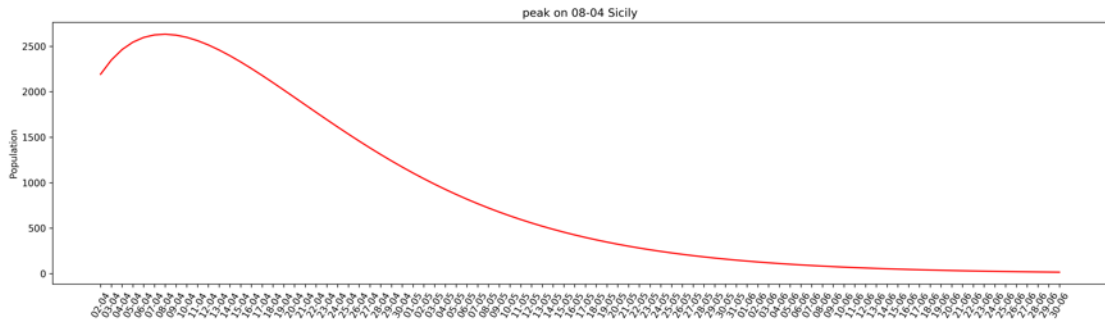

Figure S14 Sicily peak prediction of the active cases. In main manuscript is reported the new daily cases prediction peak

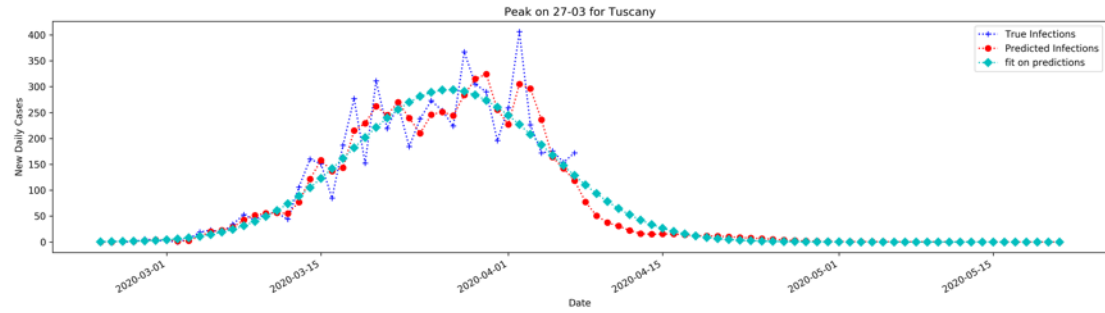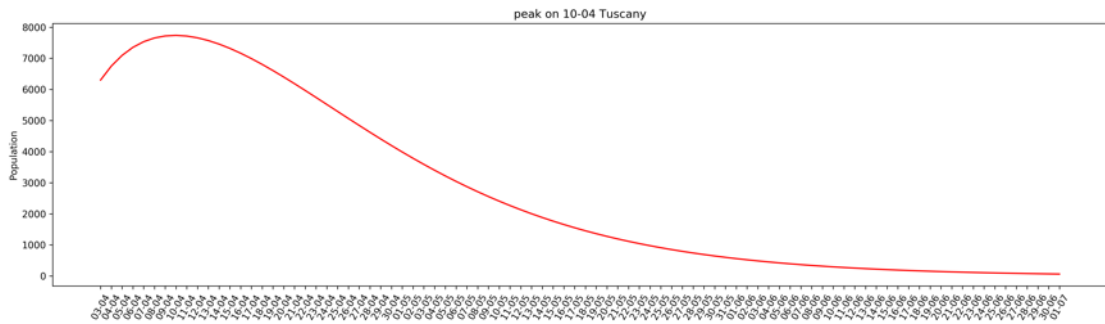

Figure S15 Tuscany peak predictions (above new daily cases and bottom the active cases)

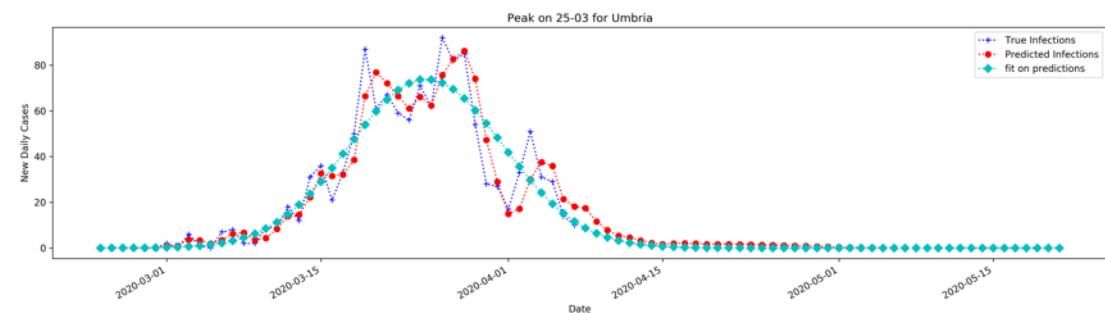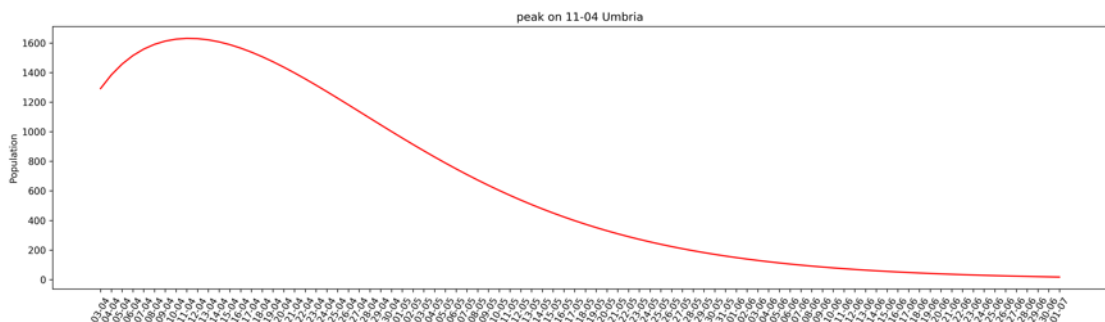

Figure S16 Umbria peak predictions (above new daily cases and bottom the active cases)



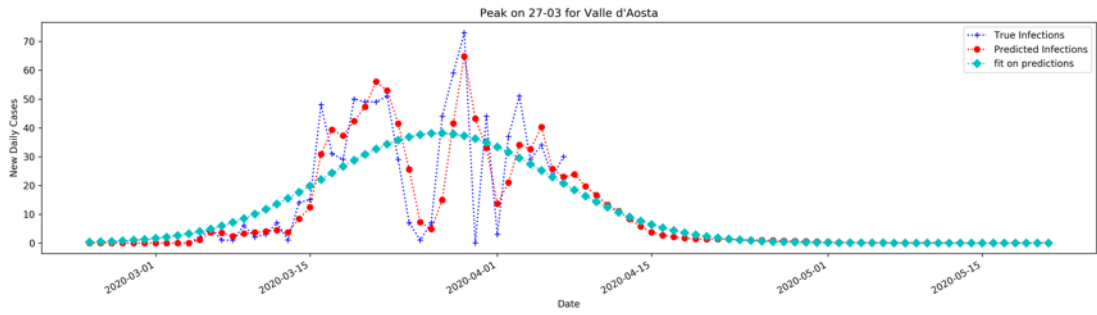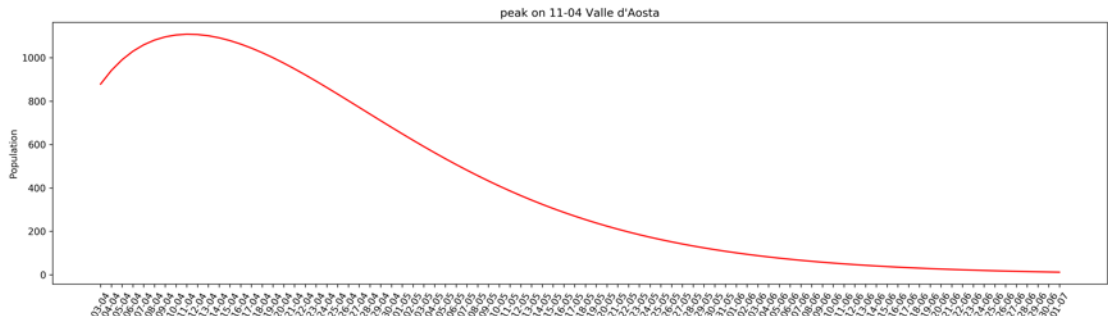

Figure S17 Valle d'Aosta peak predictions (above new daily cases and bottom the active cases)

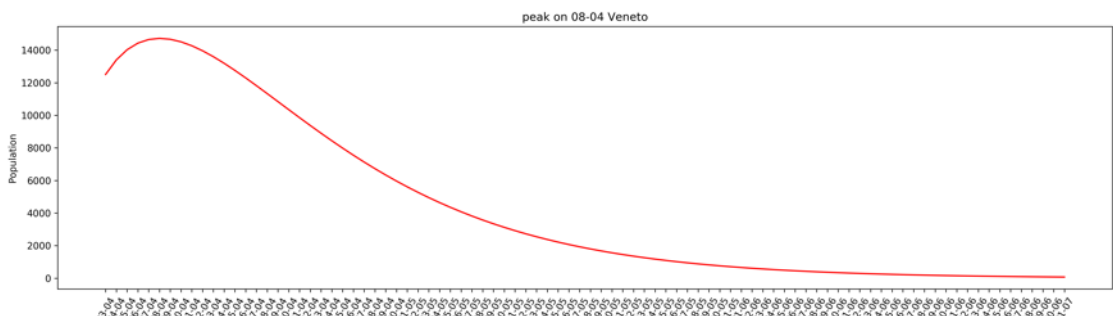

Figure S18 Veneto active cases peak prediction. The new daily cases is shown in main manuscript

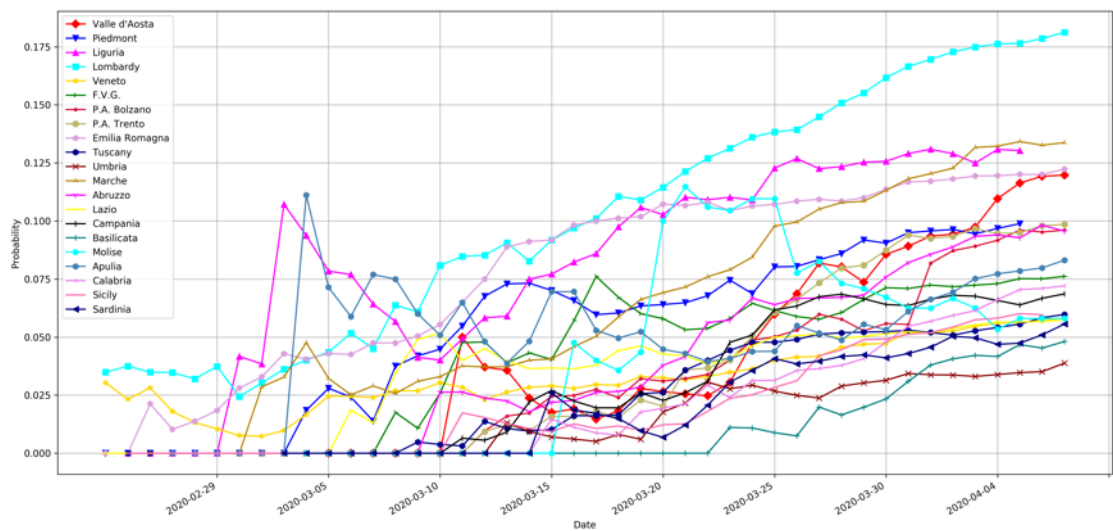

Figure S19 Lethality rate. Here the probability is related to number of deaths over the number of total cases. In main manuscript the mortality is reported in figure 1 which is normalized by the regional population.
